# Supplementary material for: Evidence of Interspecific Chromosomal Diversification in Rainbowfishes (Melanotaeniidae, Teleostei)
Source: MDPI journal article supplement (doi:10.3390/genes11070818), 2020-07-18
Supplement: s1 [file s1]

|                                     | ♀ | ♂ |
|-------------------------------------|---|---|
| <i>Melanotaenia</i> sp.             |   |   |
| <i>Glossolepis incisus</i>          |   |   |
| <i>Iriatherina werneri</i>          |   |   |
| <i>Rhadinocentrus ornatus</i>       |   |   |
| <i>Cairnsichthys rhombosomoides</i> |   |   |

Supplementary Figure 1. Male and female karyotypes of all studies species. sm, submetacentric; st/a, subtelocentric-acrocentric chromosomes. Bar equals 10  $\mu$ m.
